# Supplementary material
Source: publisher site journal article supplement (https://www.dovepress.com/article/311650)
Supplement: Supplementary file 1 [file get_supplementary_file.php]

1 **Supplementary Figure 1.** Survival curves comparing the high and low  
2 expression of *YBX1* in the BRCA cohort after adjusting potential  
3 confounding factors including patient age, gender, race and tumor stage by  
4 TIMER database.

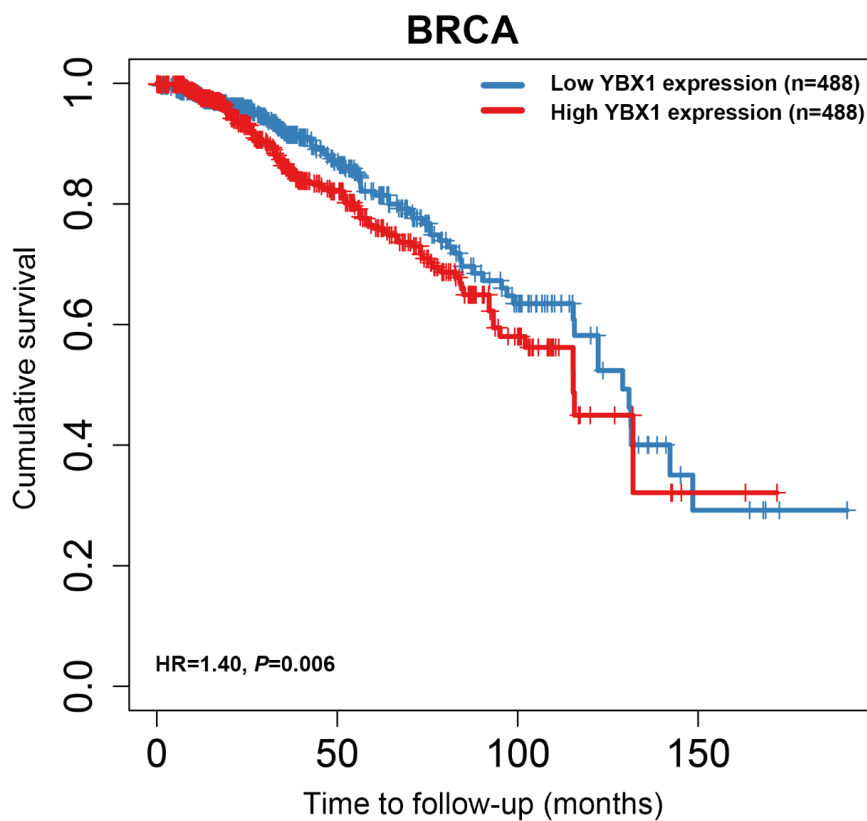

5

6 **Abbreviations:** BRCA, breast cancer; HR, hazard ratio; TIMER, the  
7 Tumor Immune Estimation Resource database; *YBX1*, Y-box binding  
8 protein 1.

9
